# Supplementary material
Source: PubMed Central journal article supplement (PMC2460571)
Supplement: NIHMS54136-supplement-Arrays.pdf [file NIHMS54136-supplement-Arrays.pdf]

# Supporting Information for: Correlated Rayleigh Scattering Spectroscopy and Scanning Electron Microscopy Studies of Au-Ag Bimetallic Nanoboxes and Nanocages

Authors: Min Hu, Jingyi Chen, Manuel Marquez, Younan Xia and Gregory V. Hartland

## TEM Measurements of Wall Thickness for Nanocages:

Because it is difficult to measure the wall thickness of the nanocages with SEM, TEM was used to determine a relationship between edge length ( $L$ ) and wall thickness ( $w$ ) for these particles. Figure S1 shows typical TEM images of type I and type II nanocages, along with SEM images of similar particles. The way the wall thickness is measured from the TEM images is indicated in this Figure. Figure S2 shows a plot of the wall thickness versus edge length for 19 nanocages. Fitting the data into a linear relationship yields  $w = 0.11 \times L - 2.4$  (in nm). This formula was used to determine the volume of the type I and type II nanocages in our linewidth analysis, see main text for details.

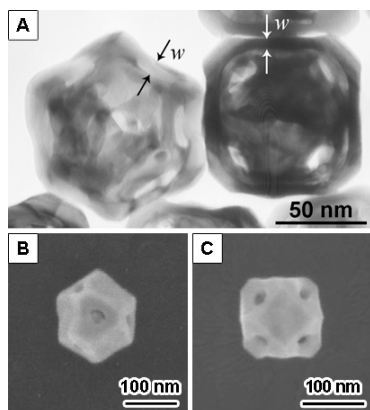

Figure S1. (A): TEM images of nanocages (both type I and type II). (B) and (C): SEM images of similar nanoparticles.

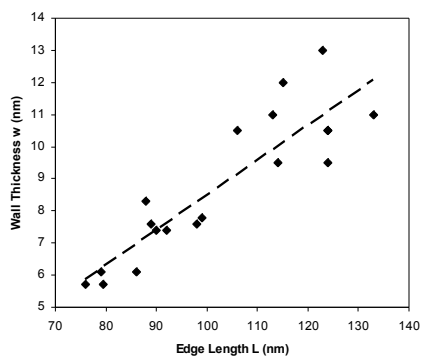

Figure S2. Relationship between wall thickness ( $w$ ) and edge length ( $L$ ) determined from TEM images.

## Dimensions, Resonance Energies and Linewidths for Nanoboxes and Nanocages:

Table S1: Data for Nanocages:  $L$  = edge length,  $w$  = wall thickness,  $E_{\text{res}}$  = resonance energy, and  $\Gamma_{\text{hom}}$  = linewidth. The errors for the averages are the standard deviation.

| Particle | $L$ (nm)       | $w$ (nm)       | $E_{\text{res}}$ (eV) | $\Gamma_{\text{hom}}$ (meV) |
|----------|----------------|----------------|-----------------------|-----------------------------|
| 1        | 75             | 8.5            | 1.78                  | 316                         |
| 2        | 91             | 12.6           | 1.80                  | 332                         |
| 3        | 93             | 13.1           | 1.71                  | 353                         |
| 4        | 97             | 11.3           | 1.71                  | 509                         |
| 5        | 98             | 11.3           | 1.76                  | 328                         |
| 6        | 99             | 14.4           | 1.72                  | 324                         |
| 7        | 99             | 12.6           | 1.72                  | 338                         |
| 8        | 99             | 12.6           | 1.67                  | 365                         |
| 9        | 99             | 12.2           | 1.68                  | 388                         |
| 10       | 101            | 10.4           | 1.73                  | 351                         |
| 11       | 102            | 14.0           | 1.68                  | 314                         |
| 12       | 105            | 13.5           | 1.66                  | 387                         |
| 13       | 107            | 17.1           | 1.71                  | 288                         |
| 14       | 109            | 12.2           | 1.67                  | 361                         |
| 15       | 110            | 10.4           | 1.68                  | 389                         |
| 16       | 111            | 12.2           | 1.61                  | 410                         |
| average  | $99.7 \pm 8.8$ | $12.4 \pm 1.9$ | $1.71 \pm 0.05$       | $360 \pm 52$                |

Table S2: Data for Type I Nanocages:  $L$  = edge length,  $d$  = hole diameter,  $E_{\text{res}}$  = resonance energy, and  $\Gamma_{\text{hom}}$  = linewidth. The wall thickness is given by the relationship determined by TEM analysis. The errors for the averages are the standard deviation.

| Particle | $L$ (nm)         | $d$ (nm)       | $E_{\text{res}}$ (eV) | $\Gamma_{\text{hom}}$ (meV) |
|----------|------------------|----------------|-----------------------|-----------------------------|
| 1        | 112              | 26.6           | 1.76                  | 324                         |
| 2        | 114              | 20.7           | 1.68                  | 470                         |
| 3        | 118              | 21.0           | 1.64                  | 348                         |
| 4        | 118              | 23.0           | 1.69                  | 490                         |
| 5        | 119              | 26.6           | 1.68                  | 476                         |
| 6        | 124              | 20.7           | 1.66                  | 282                         |
| 7        | 126              | 24.8           | 1.71                  | 443                         |
| 8        | 127              | 23.4           | 1.79                  | 405                         |
| 9        | 131              | 20.7           | 1.62                  | 467                         |
| 10       | 131              | 19.4           | 1.69                  | 521                         |
| 11       | 133              | 27.0           | 1.61                  | 466                         |
| 12       | 134              | 18.0           | 1.66                  | 460                         |
| 13       | 134              | 22.5           | 1.61                  | 384                         |
| 14       | 135              | 20.7           | 1.63                  | 328                         |
| 15       | 137              | 22.5           | 1.66                  | 438                         |
| 16       | 137              | 23.0           | 1.65                  | 455                         |
| 17       | 138              | 21.6           | 1.63                  | 392                         |
| 18       | 139              | 25.2           | 1.59                  | 503                         |
| 19       | 153              | 20.3           | 1.62                  | 396                         |
| average  | $129.5 \pm 10.2$ | $22.5 \pm 2.6$ | $1.66 \pm 0.05$       | $424 \pm 67$                |

Table S3: Data for Type II Nanocages:  $L$  = edge length,  $d$  = hole diameter,  $E_{\text{res}}$  = resonance energy, and  $\Gamma_{\text{hom}}$  = linewidth. The wall thickness is given by the relationship determined by TEM analysis. The errors for the averages are the standard deviation.

| Particle | $L$ (nm)         | $d$ (nm)       | $E_{\text{res}}$ (eV) | $\Gamma_{\text{hom}}$ (meV) |
|----------|------------------|----------------|-----------------------|-----------------------------|
| 1        | 131              | 23.0           | 1.58                  | 290                         |
| 2        | 135              | 25.7           | 1.68                  | 337                         |
| 3        | 137              | 26.1           | 1.65                  | 406                         |
| 4        | 138              | 23.0           | 1.66                  | 388                         |
| 5        | 140              | 21.2           | 1.66                  | 316                         |
| 6        | 141              | 24.8           | 1.55                  | 273                         |
| 7        | 143              | 23.0           | 1.61                  | 290                         |
| 8        | 143              | 24.8           | 1.62                  | 436                         |
| 9        | 147              | 24.8           | 1.67                  | 423                         |
| 10       | 150              | 23.0           | 1.7                   | 481                         |
| 11       | 151              | 23.9           | 1.55                  | 318                         |
| 12       | 155              | 27.9           | 1.67                  | 406                         |
| 13       | 158              | 23.0           | 1.59                  | 350                         |
| 14       | 159              | 20.3           | 1.703                 | 409                         |
| 15       | 160              | 32.9           | 1.59                  | 492                         |
| 16       | 163              | 29.7           | 1.70                  | 400                         |
| 17       | 164              | 24.8           | 1.68                  | 386                         |
| average  | $147.9 \pm 10.5$ | $24.8 \pm 3.1$ | $1.64 \pm 0.05$       | $376 \pm 65$                |
